# Supplementary material for: High-Throughput Screening Assay for Detecting Drug-Induced Changes in Synchronized Neuronal Oscillations and Potential Seizure Risk Based on Ca2+ Fluorescence Measurements in Human Induced Pluripotent Stem Cell (hiPSC)-Derived Neuronal 2D and 3D Cultures
Source: MDPI journal article supplement (doi:10.3390/cells12060958), 2023-03-21
Supplement: s1 [file s1]

**Table S1.** Average and standard deviation of the effect of 25 reference drugs on the area under the curve of Ca<sup>2+</sup> transients in hiPSC- derived neurons co-cultured with human primary astrocytes in 2D and 3D, (expressed as % change from baseline).

| Compound                    | Dose (μM)              | Area under the curve - 2D |      |         |      |          |      |          |      | Area under the curve - 3D |      |         |      |         |      |         |      |
|-----------------------------|------------------------|---------------------------|------|---------|------|----------|------|----------|------|---------------------------|------|---------|------|---------|------|---------|------|
|                             |                        | Dose 1                    |      | Dose 2  |      | Dose 3   |      | Dose 4   |      | Dose 1                    |      | Dose 2  |      | Dose 3  |      | Dose 4  |      |
|                             |                        | Mean                      | SD   | Mean    | SD   | Mean     | SD   | Mean     | SD   | Mean                      | SD   | Mean    | SD   | Mean    | SD   | Mean    | SD   |
| 4-AP                        | 0.37, 1.11, 3.33, 10   | 39.5*                     | 13.2 | 18.7    | 13.0 | 17.6     | 12.3 | 1.3*     | 15.9 | 53.7*                     | 24.5 | 54.1*   | 16.1 | 97.2    | 40.6 | 72.3    | 24.3 |
| Acetylcholine               | 11.11, 33.33, 100, 300 | 38.3                      | 34.6 | 19.9    | 26.2 | -1.3     | 48.3 | -6.1     | 24.8 | 109.9*                    | 12.9 | 110.9*  | 20.5 | 97.3*   | 16.1 | 72.7*   | 89.1 |
| Amoxapine                   | 0.11, 0.33, 1, 3       | 27.8                      | 23.3 | 25.3    | 11.4 | 22.8     | 6.9  | -40.8**  | 15.3 | 122.7                     | 33.8 | 130.2   | 28.7 | 124.0   | 26.1 | 148.1   | 42.6 |
| Amoxicillin                 | 0.11, 0.33, 1, 3       | 38.3                      | 41.6 | 23.7    | 13.1 | 45.8     | 14.7 | 43.0     | 14.7 | 147.7                     | 21.2 | 145.7   | 30.2 | 122.0   | 15.2 | 125.7   | 8.9  |
| Aspirin                     | 3.7, 11.11, 33.33, 100 | 48.5                      | 19.5 | 25.7    | 25.5 | 37.6     | 23.5 | 30.0     | 18.7 | 139.0                     | 14.0 | 139.2   | 14.4 | 147.8   | 19.8 | 133.2   | 10.8 |
| Bicuculine                  | 0.37, 1.11, 3.33, 10   | 15.8                      | 40.4 | 39.6*   | 21.1 | 1.6      | 46.8 | 22.8     | 24.9 | 105.2                     | 32.2 | 108.3   | 11.9 | 107.4   | 18.5 | 115.2   | 44.4 |
| Bupropion                   | 0.37, 1.11, 3.33, 10   | 14.5                      | 15.1 | 26.6    | 16.6 | 25.5     | 20.4 | 39.3*    | 17.3 | 137.5                     | 41.5 | 159.9** | 27.1 | 154.1** | 38.3 | 119.7** | 15.6 |
| Carbamazepine               | 3.7, 11.11, 33.33, 100 | 31.5                      | 24.1 | 62.0    | 35.8 | -39.7    | 66.8 | -100.0** | 0.0  | 122.1                     | 7.6  | 121.7   | 13.5 | 107.4   | 15.0 | 173.0   | 56.0 |
| Chlorpromazine              | 0.11, 0.33, 1, 3       | 26.5                      | 7.7  | 36.0    | 24.0 | 10.7     | 7.6  | -100.0** | 0.0  | 128.5*                    | 28.9 | 129.9** | 16.1 | 132.1*  | 23.7 | 131.9** | 15.5 |
| Clozapine                   | 0.04, 0.11, 0.33, 1    | 28.5                      | 12.0 | 49.0*   | 17.4 | 28.8     | 34.9 | 10.8*    | 11.4 | 150.1**                   | 34.9 | 153.9** | 33.7 | 163.3** | 14.3 | 182.8** | 23.5 |
| Cyclothiazide               | 3.7, 11.11, 33.33, 100 | 48.0*                     | 15.5 | 18.7    | 19.8 | -9.3     | 42.9 | -53.8    | 71.6 | 135.8                     | 24.8 | 187.3   | 13.0 | 245.1*  | 88.8 | 204.6** | 89.9 |
| Enoxacin                    | 0.37, 1.11, 3.33, 10   | 25.5                      | 22.4 | 41.0    | 20.9 | 47.3     | 19.9 | 49.3*    | 36.1 | 115.6                     | 18.4 | 124.6   | 11.2 | 139.4   | 20.5 | 114.6   | 23.3 |
| GABA                        | 0.11, 0.33, 1, 3       | 23.1                      | 18.2 | 21.1    | 19.1 | 16.4     | 41.6 | 14.9     | 42.4 | 111.5                     | 21.7 | 116.2   | 17.4 | 97.0    | 37.0 | 118.7   | 8.0  |
| Glutamate                   | 1.11, 3.33, 10, 30     | 5.8                       | 55.1 | -13.0   | 52.2 | -72.1*   | 27.0 | -100.0*  | 0.0  | 116.3                     | 40.3 | 129.9   | 26.3 | 128.0   | 42.4 | 116.3   | 20.1 |
| Kainic Acid                 | 0.37, 1.11, 3.33, 10   | 32.3                      | 25.7 | 25.2    | 23.1 | -48.2    | 41.4 | -100.0   | 0.0  | 120.5                     | 30.6 | 141.9   | 32.0 | 174.3   | 79.8 | 58.3**  | 34.8 |
| Maprotiline                 | 0.37, 1.11, 3.33, 10   | 12.2                      | 14.8 | -55.2** | 9.7  | -100.0** | 0.0  | -100.0** | 0.0  | 139.7**                   | 33.0 | 133.4** | 23.7 | 123.1** | 9.9  | 11.9**  | 24.7 |
| Mefloquine                  | 1.11, 3.33, 10, 30     | 14.8                      | 26.4 | -47.2** | 5.9  | -100.0** | 0.0  | -100.0** | 0.0  | 159.0                     | 8.2  | 143.4   | 9.3  | 135.6   | 21.2 | 74.4*   | 26.3 |
| MK-801                      | 0.11, 0.33, 1, 3       | -35.7*                    | 42.5 | -57.0*  | 45.8 | -57.4**  | 45.0 | -79.8**  | 36.4 | 127.3                     | 51.8 | 66.6    | 86.3 | -66.9** | 81.0 | 41.0**  | 79.8 |
| Paracetamol (acetaminophen) | 1.11, 3.33, 10, 30     | 23.0                      | 25.2 | 35.8    | 27.7 | 13.2     | 26.9 | -93.2**  | 16.7 | 104.3                     | 22.6 | 121.7   | 30.6 | 122.4   | 7.5  | 132.0   | 12.8 |
| Pazopanib                   | 0.37, 1.11, 3.33, 10   | -1.8                      | 57.4 | 7.8     | 10.8 | 38.8*    | 19.1 | 16.3     | 23.1 | 125.7                     | 53.1 | 127.9   | 25.1 | 116.3   | 16.9 | 117.4   | 11.0 |
| Phenytoin                   | 3.7, 11.11, 33.33, 100 | 33.2                      | 17.2 | 27.5    | 8.3  | 15.8     | 14.6 | 33.3     | 8.3  | 132.1**                   | 26.1 | 177.0** | 32.2 | 199.3** | 79.5 | 198.2** | 34.5 |

|              |                        |      |      |       |      |         |      |         |      |         |      |         |      |         |      |         |      |
|--------------|------------------------|------|------|-------|------|---------|------|---------|------|---------|------|---------|------|---------|------|---------|------|
| Pilocarpine  | 0.37, 1.11, 3.33, 10   | 26.7 | 5.9  | 38.8* | 15.0 | 26.7    | 28.6 | 22.8    | 12.6 | 141.5   | 61.4 | 173.5** | 38.8 | 168.7** | 14.1 | 145.2** | 21.1 |
| Quinacrine   | 0.37, 1.11, 3.33, 10   | 5.3* | 13.9 | 11.2* | 6.1  | -13.8** | 6.9  | -84.7** | 23.9 | 123.5   | 42.8 | 149.1*  | 45.6 | 139.1*  | 43.9 | 128.2*  | 13.8 |
| Serotonin    | 3.7, 11.11, 33.33, 100 | 12.8 | 16.1 | 11.1  | 47.3 | -8.9    | 50.2 | -2.6    | 23.7 | -19.4** | 74.6 | 19.8**  | 66.4 | -21.3** | 66.6 | -21.1** | 79.1 |
| Theophylline | 11.11, 33.33, 100, 300 | 32.3 | 22.0 | 41.7  | 16.1 | 29.7    | 11.0 | 72.8**  | 24.8 | 156.1   | 23.7 | 171.1   | 49.0 | 148.8   | 78.5 | 134.2   | 82.1 |

\*:  $p < 0.05$  vs. 0.1% DMSO, \*\*:  $p < 0.01$  vs 0.1% DMSO.

**Table S2.** Average and standard deviation of the effect of 25 reference drugs on the peak-to-peak interval of  $\text{Ca}^{2+}$  transients in hiPSC- derived neurons co-cultured with human primary astrocytes in 2D and 3D, (expressed as % change from baseline).

| Compound                    | Dose ( $\mu\text{M}$ ) | Peak-to-peak interval - 2D |       |         |       |          |       |          |       | Peak-to-peak interval - 3D |      |         |       |          |       |          |       |
|-----------------------------|------------------------|----------------------------|-------|---------|-------|----------|-------|----------|-------|----------------------------|------|---------|-------|----------|-------|----------|-------|
|                             |                        | Dose 1                     |       | Dose 2  |       | Dose 3   |       | Dose 4   |       | Dose 1                     |      | Dose 2  |       | Dose 3   |       | Dose 4   |       |
|                             |                        | Mean                       | SD    | Mean    | SD    | Mean     | SD    | Mean     | SD    | Mean                       | SD   | Mean    | SD    | Mean     | SD    | Mean     | SD    |
| 4-AP                        | 0.37, 1.11, 3.33, 10   | -13.0*                     | 14.6  | -29.8** | 13.3  | -42.4**  | 22.1  | -49.8**  | 12.0  | -9.2**                     | 11.3 | -24.1** | 25.0  | -17.6**  | 15.1  | -47.2**  | 7.5   |
| Acetylcholine               | 11.11, 33.33, 100, 300 | 28.0                       | 82.6  | -25.8   | 76.1  | 11.3**   | 107.6 | 45.5*    | 160.3 | 89.6                       | 98.3 | 38.9    | 69.0  | -5.5     | 80.4  | 75.9     | 119.7 |
| Amoxapine                   | 0.11, 0.33, 1, 3       | 8.8                        | 15.6  | -7.8    | 37.0  | -4.5     | 32.6  | 56.7     | 35.3  | 14.8                       | 19.3 | 7.1     | 12.7  | 4.4      | 22.8  | -6.6**   | 36.5  |
| Amoxicillin                 | 0.11, 0.33, 1, 3       | 27.3                       | 17.9  | 9.3     | 66.0  | -16.0    | 10.4  | -7.8     | 24.9  | 12.1                       | 15.8 | 9.0     | 14.9  | -5.5     | 14.4  | -1.2     | 15.1  |
| Aspirin                     | 3.7, 11.11, 33.33, 100 | 15.5                       | 27.2  | 1.8     | 18.8  | -0.5     | 27.7  | -17.0*   | 20.5  | 10.9                       | 20.8 | -2.2    | 15.5  | -1.7     | 16.9  | 6.7      | 20.2  |
| Bicuculine                  | 0.37, 1.11, 3.33, 10   | -17.2                      | 57.9  | 8.2     | 46.9  | -26.1    | 42.0  | -13.2    | 47.6  | 7.6                        | 42.2 | 20.3    | 31.8  | 12.1     | 23.2  | 9.4      | 27.9  |
| Bupropion                   | 0.37, 1.11, 3.33, 10   | -5.5*                      | 14.4  | 3.4     | 26.2  | 19.7     | 23.3  | 41.8     | 96.0  | 4.1                        | 19.2 | 15.3    | 18.8  | 7.8      | 15.4  | -3.5     | 16.9  |
| Carbamazepine               | 3.7, 11.11, 33.33, 100 | 0.8                        | 61.0  | 45.8    | 43.9  | 45.0     | 170.1 | -100.0** | 0.0   | -4.9                       | 14.5 | 9.5     | 31.1  | 33.5     | 49.4  | 25.1     | 60.0  |
| Chlorpromazine              | 0.11, 0.33, 1, 3       | 47.2                       | 45.6  | 48.0    | 16.9  | 151.3**  | 79.9  | -100.0** | 0.0   | 10.0                       | 38.8 | 12.5    | 35.4  | -9.6**   | 17.5  | 6.0      | 15.0  |
| Clozapine                   | 0.04, 0.11, 0.33, 1    | 1.2                        | 17.5  | -15.5*  | 20.0  | 82.0     | 93.1  | 2.7      | 65.1  | 4.5                        | 22.2 | 19.2    | 18.9  | 5.6*     | 10.3  | 14.2     | 14.9  |
| Cyclothiazide               | 3.7, 11.11, 33.33, 100 | 9.2                        | 29.7  | -53.3** | 12.4  | 0.3      | 78.5  | -70.3    | 46.0  | 6.7                        | 20.0 | -14.5*  | 23.0  | -30.0*   | 27.3  | -49.3**  | 5.8   |
| Enoxacin                    | 0.37, 1.11, 3.33, 10   | 18.0                       | 31.2  | 1.3     | 31.4  | 12.7     | 16.6  | -3.0     | 30.4  | 30.9                       | 33.3 | -0.7    | 13.5  | -1.3     | 21.4  | -1.1     | 26.5  |
| GABA                        | 0.11, 0.33, 1, 3       | -12.3                      | 36.2  | 29.1    | 42.6  | 32.0     | 121.8 | -26.3*   | 72.3  | 0.2                        | 21.6 | -2.1    | 18.1  | 8.3      | 35.1  | -2.5     | 9.8   |
| Glutamate                   | 1.11, 3.33, 10, 30     | -2.2                       | 74.3  | -17.4   | 62.7  | 96.3     | 372.1 | -100.0   | 0.0   | 11.6                       | 24.2 | 3.1     | 32.4  | 0.4      | 30.3  | -1.6     | 19.4  |
| Kainic Acid                 | 0.37, 1.11, 3.33, 10   | -1.2                       | 35.3  | -19.6   | 13.9  | -53.0    | 59.6  | -100.0   | 0.0   | 0.2                        | 27.7 | -16.0** | 11.4  | -13.0*   | 17.7  | -45.2**  | 16.3  |
| Maprotiline                 | 0.37, 1.11, 3.33, 10   | 1.8                        | 17.9  | 11.7    | 60.7  | -100.0** | 0.0   | -100.0** | 0.0   | 6.2*                       | 14.8 | 8.4     | 17.2  | 10.6     | 17.7  | -4.1*    | 19.9  |
| Mefloquine                  | 1.11, 3.33, 10, 30     | 25.0                       | 40.1  | 48.2    | 135.5 | -100.0** | 0.0   | -100.0** | 0.0   | 7.1                        | 14.6 | 1.7     | 17.1  | 12.8     | 51.3  | 8.3      | 42.5  |
| MK-801                      | 0.11, 0.33, 1, 3       | 203.5                      | 254.8 | 3.6     | 231.7 | -57.4    | 95.3  | -100.0** | 0.0   | 76.1*                      | 28.7 | 66.4    | 149.3 | -100.0** | 0.0   | -100.0** | 0.0   |
| Paracetamol (acetaminophen) | 1.11, 3.33, 10, 30     | 34.0                       | 23.1  | -35.3   | 53.4  | -14.5    | 116.9 | -100.0** | 0.0   | 12.7                       | 19.3 | 17.4    | 29.6  | -6.2     | 20.6  | -8.8     | 21.6  |
| Pazopanib                   | 0.37, 1.11, 3.33, 10   | 14.6                       | 67.0  | -2.6    | 23.6  | 0.5      | 44.8  | 14.2     | 46.9  | -2.0                       | 32.5 | 4.1     | 7.0   | -3.0     | 19.7  | 7.5      | 31.1  |
| Phenytoin                   | 3.7, 11.11, 33.33, 100 | 46.3                       | 19.7  | 22.2    | 24.8  | 89.0*    | 50.4  | 44.5     | 33.9  | 2.9*                       | 9.0  | 8.2*    | 12.1  | 17.7     | 19.8  | 6.6      | 13.1  |
| Pilocarpine                 | 0.37, 1.11, 3.33, 10   | 1.3                        | 15.9  | 5.8     | 25.7  | -9.2     | 18.3  | 29.8     | 28.6  | -10.1                      | 25.7 | -10.0   | 27.7  | -3.3     | 25.7  | -12.6*   | 20.5  |
| Quinacrine                  | 0.37, 1.11, 3.33, 10   | 7.0                        | 24.1  | -4.0    | 8.6   | 40.2     | 85.8  | -18.2    | 127.4 | -0.7                       | 20.4 | 6.2     | 27.5  | -5.5*    | 15.5  | -9.8**   | 10.7  |
| Serotonin                   | 3.7, 11.11, 33.33, 100 | 28.4                       | 57.6  | 65.8    | 230.8 | 36.4     | 99.7  | 55.3     | 106.3 | -58.0                      | 62.7 | -37.9   | 105.0 | 29.2     | 205.3 | -82.0**  | 59.8  |

|              |                        |      |      |      |      |        |      |         |      |       |      |        |      |         |      |         |      |
|--------------|------------------------|------|------|------|------|--------|------|---------|------|-------|------|--------|------|---------|------|---------|------|
| Theophylline | 11.11, 33.33, 100, 300 | 24.3 | 22.5 | -5.2 | 27.0 | -26.3* | 11.3 | -46.8** | 12.4 | -4.0* | 12.0 | -21.2* | 23.5 | -37.1** | 22.7 | -45.7** | 21.9 |
|--------------|------------------------|------|------|------|------|--------|------|---------|------|-------|------|--------|------|---------|------|---------|------|

\*: p <0.05 vs. 0.1% DMSO, \*\*: p <0.01 vs 0.1% DMSO.

**Table S3.** Average and standard deviation of the effect of 25 reference drugs on the peak width of Ca<sup>2+</sup> transients in hiPSC- derived neurons co-cultured with human primary astrocytes in 2D and 3D, (expressed as % change from baseline).

| Compound                    | Dose (μM)              | Peak width - 2D |      |         |      |          |       |          |       | Peak width - 3D |      |         |      |         |      |         |      |
|-----------------------------|------------------------|-----------------|------|---------|------|----------|-------|----------|-------|-----------------|------|---------|------|---------|------|---------|------|
|                             |                        | Dose 1          |      | Dose 2  |      | Dose 3   |       | Dose 4   |       | Dose 1          |      | Dose 2  |      | Dose 3  |      | Dose 4  |      |
|                             |                        | Mean            | SD   | Mean    | SD   | Mean     | SD    | Mean     | SD    | Mean            | SD   | Mean    | SD   | Mean    | SD   | Mean    | SD   |
| 4-AP                        | 0.37, 1.11, 3.33, 10   | 34.0            | 16.5 | 14.3    | 13.2 | 12.6     | 15.5  | -6.3**   | 15.6  | 2.8             | 8.7  | 7.7     | 3.2  | 35.1*   | 19.3 | 21.4    | 14.3 |
| Acetylcholine               | 11.11, 33.33, 100, 300 | 26.2            | 32.0 | 16.2    | 23.3 | -3.8     | 47.1  | 2.6      | 29.8  | 4.2             | 6.0  | 0.4     | 4.8  | 0.0     | 7.2  | -12.2   | 44.4 |
| Amoxapine                   | 0.11, 0.33, 1, 3       | 22.0            | 22.8 | 14.8    | 10.7 | 31.7     | 13.6  | -37.7**  | 12.8  | 11.9            | 8.1  | 12.5    | 14.5 | 6.8     | 6.8  | 21.0*   | 18.5 |
| Amoxicillin                 | 0.11, 0.33, 1, 3       | 22.3            | 49.7 | 25.7    | 14.0 | 48.0     | 17.4  | 47.7*    | 17.6  | 4.7             | 4.2  | 5.5     | 10.9 | -4.5    | 7.9  | 1.2     | 3.1  |
| Aspirin                     | 3.7, 11.11, 33.33, 100 | 43.6            | 22.5 | 25.9    | 26.0 | 38.3     | 25.2  | 32.1     | 24.6  | 4.2             | 2.9  | 0.3     | 2.5  | 5.0     | 9.9  | 4.7     | 7.7  |
| Bicuculine                  | 0.37, 1.11, 3.33, 10   | 16.1            | 41.6 | 33.0    | 18.2 | 3.7      | 48.7  | 11.5     | 21.8  | -0.3            | 12.4 | 5.7     | 3.8  | 2.7     | 6.4  | 8.5     | 23.9 |
| Bupropion                   | 0.37, 1.11, 3.33, 10   | 12.8            | 10.4 | 26.6    | 21.2 | 29.2     | 20.8  | 46.5*    | 23.4  | 0.0             | 15.2 | 9.4     | 9.2  | 9.0     | 6.4  | -1.4*   | 10.6 |
| Carbamazepine               | 3.7, 11.11, 33.33, 100 | 19.0            | 28.0 | 66.5    | 45.3 | -36.7    | 69.5  | -100.0** | 0.0   | 2.9             | 4.7  | 2.8     | 3.4  | 5.1     | 7.4  | 43.8**  | 28.8 |
| Chlorpromazine              | 0.11, 0.33, 1, 3       | 18.0            | 8.5  | 38.5    | 31.2 | 13.8     | 7.0   | -100.0** | 0.0   | 13.3            | 10.0 | 13.6    | 11.2 | 13.0*   | 11.1 | 16.6    | 3.9  |
| Clozapine                   | 0.04, 0.11, 0.33, 1    | 20.8            | 19.1 | 35.5    | 16.6 | 22.8     | 30.9  | 11.0     | 15.5  | 6.2             | 9.2  | 8.6     | 10.3 | 14.0    | 4.5  | 22.6**  | 7.7  |
| Cyclothiazide               | 3.7, 11.11, 33.33, 100 | 50.8            | 31.8 | 24.5    | 26.9 | 207.5    | 381.1 | -17.3    | 128.1 | 0.7             | 7.7  | 23.6**  | 13.1 | 64.7**  | 39.4 | 80.0**  | 39.9 |
| Enoxacin                    | 0.37, 1.11, 3.33, 10   | 18.3            | 19.5 | 45.8    | 17.6 | 39.0     | 26.7  | 49.0     | 40.0  | 3.2             | 3.3  | -2.2    | 9.7  | 3.0     | 3.8  | -1.1    | 6.1  |
| GABA                        | 0.11, 0.33, 1, 3       | 13.2            | 21.4 | 15.4    | 19.9 | 11.7     | 39.7  | 8.5      | 38.5  | 7.6             | 6.9  | 0.5     | 1.7  | -2.7    | 15.4 | 0.7     | 3.3  |
| Glutamate                   | 1.11, 3.33, 10, 30     | -3.4            | 49.8 | -5.2    | 57.0 | -67.3*   | 31.5  | -100.0*  | 0.0   | 12.5            | 11.3 | 8.6**   | 5.7  | 8.1     | 12.8 | 2.8     | 7.2  |
| Kainic Acid                 | 0.37, 1.11, 3.33, 10   | 22.0            | 31.4 | 37.4    | 16.2 | -23.0    | 62.7  | -100.0** | 0.0   | 4.9             | 10.3 | 10.6    | 13.6 | 41.9    | 35.3 | -20.1   | 24.0 |
| Maprotiline                 | 0.37, 1.11, 3.33, 10   | 4.5*            | 13.1 | -57.2** | 10.5 | -100.0** | 0.0   | -100.0** | 0.0   | 6.2             | 8.8  | -1.0*   | 9.7  | -3.2*   | 6.1  | -40.8** | 11.9 |
| Mefloquine                  | 1.11, 3.33, 10, 30     | 15.8            | 29.1 | -47.0** | 5.1  | -100.0** | 0.0   | -100.0** | 0.0   | 2.6             | 3.3  | 1.4     | 3.5  | -1.5    | 7.1  | -10.9   | 9.0  |
| MK-801                      | 0.11, 0.33, 1, 3       | -3.2            | 66.1 | -23.6   | 88.7 | -32.8    | 77.7  | -70.0    | 57.7  | 8.0             | 15.1 | -29.3*  | 36.5 | -85.8** | 34.7 | -36.8** | 35.5 |
| Paracetamol (acetaminophen) | 1.11, 3.33, 10, 30     | 13.0            | 11.2 | 34.3    | 33.6 | 16.2     | 32.4  | -92.5**  | 18.4  | 0.6             | 6.3  | 5.9     | 14.0 | 6.3     | 4.4  | 9.0     | 5.5  |
| Pazopanib                   | 0.37, 1.11, 3.33, 10   | -4.8            | 58.2 | 12.6    | 17.8 | 27.8*    | 13.3  | 3.7      | 17.9  | 9.7             | 17.4 | 7.7     | 8.3  | 4.1     | 8.0  | 8.7     | 5.2  |
| Phenytoin                   | 3.7, 11.11, 33.33, 100 | 27.2            | 16.2 | 31.5    | 11.2 | 17.0     | 15.1  | 34.7     | 10.1  | 7.4             | 4.8  | 29.4*   | 13.8 | 47.9    | 35.6 | 50.5**  | 28.3 |
| Pilocarpine                 | 0.37, 1.11, 3.33, 10   | 19.2            | 7.4  | 35.7*   | 11.2 | 23.2     | 24.7  | 23.0     | 15.0  | 6.3             | 5.2  | 6.7     | 3.9  | 10.2    | 2.4  | 7.0     | 6.0  |
| Quinacrine                  | 0.37, 1.11, 3.33, 10   | 2.8*            | 12.9 | 10.7*   | 7.0  | -12.8**  | 9.5   | -84.3**  | 24.4  | -1.8*           | 16.8 | 4.2     | 12.7 | 10.6    | 18.7 | 9.5     | 6.9  |
| Serotonin                   | 3.7, 11.11, 33.33, 100 | 17.3            | 17.5 | 18.3*   | 49.0 | -1.4     | 53.3  | 11.4     | 23.8  | -54.0**         | 41.8 | -31.8** | 36.5 | -52.3** | 40.4 | -55.4** | 42.8 |
| Theophylline                | 11.11, 33.33, 100, 300 | 22.8            | 25.6 | 31.2    | 17.0 | 24.3     | 10.8  | 112.8**  | 49.2  | 11.1*           | 3.8  | 12.2*   | 10.0 | 21.3    | 36.8 | 29.3    | 57.6 |

\*: p <0.05 vs. 0.1% DMSO, \*\*: p <0.01 vs 0.1% DMSO.

**Table S4.** Average and standard deviation of the effect of 25 reference drugs on the peak amplitude of Ca<sup>2+</sup> transients in hiPSC-derived neurons co-cultured with human primary astrocytes in 2D and 3D, (expressed as % change from baseline).

| Compound                    | Dose (μM)              | Peak amplitude - 2D |      |         |       |          |       |          |      | Peak amplitude - 3D |      |         |      |         |      |         |      |
|-----------------------------|------------------------|---------------------|------|---------|-------|----------|-------|----------|------|---------------------|------|---------|------|---------|------|---------|------|
|                             |                        | Dose 1              |      | Dose 2  |       | Dose 3   |       | Dose 4   |      | Dose 1              |      | Dose 2  |      | Dose 3  |      | Dose 4  |      |
|                             |                        | Mean                | SD   | Mean    | SD    | Mean     | SD    | Mean     | SD   | Mean                | SD   | Mean    | SD   | Mean    | SD   | Mean    | SD   |
| 4-AP                        | 0.37, 1.11, 3.33, 10   | 13.3**              | 2.3  | 7.8     | 7.4   | 10.4*    | 3.7   | 8.5      | 7.3  | 44.3                | 11.8 | 39.6*   | 9.5  | 46.1    | 11.5 | 42.8    | 13.3 |
| Acetylcholine               | 11.11, 33.33, 100, 300 | 11.4                | 8.3  | 2.3     | 12.3  | -17.0    | 39.3  | -12.8    | 12.0 | 90.9                | 9.7  | 105.2   | 13.6 | 88.6    | 9.3  | 56.5    | 77.8 |
| Amoxapine                   | 0.11, 0.33, 1, 3       | 7.7                 | 6.0  | 12.7    | 7.9   | -1.5     | 5.3   | -20.7*   | 11.0 | 92.4*               | 26.3 | 101.9** | 18.2 | 102.7*  | 25.0 | 105.1** | 19.2 |
| Amoxicillin                 | 0.11, 0.33, 1, 3       | 19.3**              | 3.0  | 5.0     | 2.6   | 8.3      | 3.6   | 7.5      | 4.3  | 136.9               | 21.8 | 132.0   | 18.7 | 130.1   | 14.4 | 123.5   | 7.3  |
| Aspirin                     | 3.7, 11.11, 33.33, 100 | 13.1*               | 6.5  | 4.2     | 7.3   | 6.2*     | 4.5   | 3.9      | 5.4  | 129.1               | 11.3 | 138.1   | 16.4 | 135.8   | 14.8 | 123.5   | 13.1 |
| Bicuculine                  | 0.37, 1.11, 3.33, 10   | -4.1                | 32.1 | 9.3*    | 13.4  | -14.1    | 38.1  | 9.8*     | 12.8 | 101.6               | 15.0 | 98.3    | 9.1  | 102.8   | 8.2  | 99.3    | 8.2  |
| Bupropion                   | 0.37, 1.11, 3.33, 10   | 2.7                 | 7.6  | 5.4     | 3.6   | 3.7      | 3.3   | 4.7      | 4.7  | 126.7**             | 26.7 | 134.2** | 13.9 | 128.1** | 24.6 | 118.0** | 13.7 |
| Carbamazepine               | 3.7, 11.11, 33.33, 100 | 16.5**              | 6.3  | 8.5     | 5.8   | -52.0**  | 52.7  | -100.0** | 0.0  | 114.1               | 11.1 | 114.1   | 14.1 | 93.5*   | 11.2 | 85.2    | 15.4 |
| Chlorpromazine              | 0.11, 0.33, 1, 3       | 8.7*                | 3.4  | 4.0     | 2.8** | -4.3     | 3.5** | -100.0   | 0.0  | 96.7*               | 18.0 | 100.7** | 10.8 | 102.4** | 10.6 | 98.4**  | 12.1 |
| Clozapine                   | 0.04, 0.11, 0.33, 1    | 12.5**              | 4.9  | 16.7**  | 3.8   | 9.4*     | 7.6   | 1.0      | 2.9  | 133.6**             | 21.2 | 130.9** | 14.9 | 129.8** | 13.9 | 129.4** | 14.0 |
| Cyclothiazide               | 3.7, 11.11, 33.33, 100 | 12.3*               | 7.2  | -0.5*   | 3.9   | -24.0**  | 12.2  | -72.8**  | 42.1 | 126.0               | 26.0 | 139.0   | 20.3 | 113.7   | 20.4 | 83.6*   | 26.3 |
| Enoxacin                    | 0.37, 1.11, 3.33, 10   | 7.8                 | 9.8  | 5.3     | 5.6   | 13.5*    | 1.8   | 11.3*    | 5.7  | 106.8*              | 18.1 | 123.3   | 17.4 | 129.6   | 18.4 | 116.3   | 18.3 |
| GABA                        | 0.11, 0.33, 1, 3       | 9.1                 | 6.9  | 5.7     | 5.8   | -1.4     | 32.4  | -2.7     | 32.9 | 87.8                | 24.3 | 112.0   | 15.1 | 90.5    | 22.1 | 110.9   | 9.1  |
| Glutamate                   | 1.11, 3.33, 10, 30     | -8.5                | 45.5 | -26.9   | 41.7  | -60.9*   | 37.3  | -100.0*  | 0.0  | 85.4*               | 28.8 | 108.3   | 20.3 | 103.9   | 23.6 | 107.0   | 15.0 |
| Kainic Acid                 | 0.37, 1.11, 3.33, 10   | 11.8*               | 4.3  | -2.2    | 9.1   | -55.0**  | 35.7  | -100.0** | 0.0  | 104.1               | 20.0 | 122.6   | 24.4 | 104.0   | 34.6 | 99.6*   | 8.7  |
| Maprotiline                 | 0.37, 1.11, 3.33, 10   | 8.3                 | 5.6  | -19.8** | 4.2   | -100.0** | 0.0   | -100.0** | 0.0  | 116.3**             | 23.1 | 131.3** | 10.8 | 130.1** | 9.3  | 72.2    | 8.7  |
| Mefloquine                  | 1.11, 3.33, 10, 30     | 0.5                 | 6.4  | -21.2** | 9.2   | -100.0** | 0.0   | -100.0** | 0.0  | 149.7               | 16.4 | 139.0   | 7.5  | 135.0   | 15.8 | 99.9*   | 18.2 |
| MK-801                      | 0.11, 0.33, 1, 3       | -41.8**             | 29.8 | -63.6** | 34.2  | -58.6**  | 38.3  | -79.7**  | 31.6 | 104.7               | 20.9 | 76.2    | 89.3 | -64.1*  | 88.0 | 67.2    | 94.0 |
| Paracetamol (acetaminophen) | 1.11, 3.33, 10, 30     | 8.8                 | 16.3 | 12.3    | 11.1  | -0.3     | 4.7   | -89.8**  | 24.9 | 97.4                | 21.1 | 106.4   | 8.0  | 108.6   | 7.8  | 113.9   | 11.3 |
| Pazopanib                   | 0.37, 1.11, 3.33, 10   | -15.8               | 47.1 | -3.8    | 4.8   | 11.2*    | 7.2   | 9.5      | 14.3 | 101.6               | 21.8 | 110.2   | 10.6 | 107.5   | 4.5  | 101.7   | 6.1  |
| Phenytoin                   | 3.7, 11.11, 33.33, 100 | 7.3                 | 3.8  | -0.2    | 4.7   | -3.0*    | 5.5   | 0.2*     | 1.8  | 111.5**             | 21.0 | 110.4** | 12.7 | 91.2*   | 9.8  | 88.4    | 19.3 |
| Pilocarpine                 | 0.37, 1.11, 3.33, 10   | 9.3                 | 4.8  | 8.0     | 4.7   | 5.8      | 10.1  | 3.8      | 3.8  | 115.6               | 54.9 | 145.8** | 35.4 | 135.3** | 14.8 | 122.5** | 17.2 |
| Quinacrine                  | 0.37, 1.11, 3.33, 10   | 1.8                 | 5.6  | 1.2     | 3.8   | -7.8**   | 4.8   | -78.0**  | 34.2 | 113.4*              | 28.7 | 128.3** | 28.6 | 108.9*  | 41.9 | 108.3** | 19.8 |
| Serotonin                   | 3.7, 11.11, 33.33, 100 | -4.9                | 8.4  | -13.7   | 29.7  | -27.1    | 39.0  | -16.6    | 7.9  | -4.3**              | 85.3 | 33.7    | 72.3 | -3.1**  | 80.7 | -10.3** | 88.3 |
| Theophylline                | 11.11, 33.33, 100, 300 | 12.7                | 4.9  | 15.3*   | 3.7   | 10.0**   | 3.1   | 6.0**    | 6.5  | 121.2               | 16.2 | 142.1   | 29.3 | 99.6*   | 21.9 | 89.4**  | 10.2 |

\*: p <0.05 vs. 0.1% DMSO, \*\*: p <0.01 vs 0.1% DMSO.
